# Supplementary material for: Voriconazole Pharmacokinetics in Critically Ill Patients and Extracorporeal Membrane Oxygenation Support: A Retrospective Comparative Case-Control Study
Source: MDPI journal article supplement (doi:10.3390/antibiotics12071100), 2023-06-25
Supplement: s1 [file s1]

## Supplementary materials

**Table S1.** ECMO device variables.

| ECMO group (N = 9 patients)  |                       |                |
|------------------------------|-----------------------|----------------|
| Type of ECMO                 | Venous-venous         | 9 (100)        |
|                              | Venous-arterial       | 0 (0)          |
| Oxygenator membrane*         | EOS ECMO (Sorin)      | 1 (12.50)      |
|                              | Quadrox PLS (Maquet)  | 3 (37.50)      |
|                              | Euroset               | 2 (25.00)      |
|                              | HLS 5 (Maquet)        | 1 (12.50)      |
|                              | HLS 7 (Maquet)        | 1 (12.50)      |
| Blood pump*                  | Maquet Rotaflow       | 4 (50.00)      |
|                              | Centrimag and Pedimag | 2 (25.00)      |
|                              | Cardiohelp            | 2 (25.00)      |
| Days of ECMO support         |                       | 47 (24.25)     |
| Number of membrane exchanges |                       | 10 (37.00)     |
| ECMO group (N = 27 samples)  |                       |                |
| ECMO FiO <sub>2</sub> (%)    |                       | 100 (10.00)    |
| Blood pump speed (rpm)       |                       | 3700 (1475.00) |
| Blood pump flux (mL/min)     |                       | 4.80 (2.00)    |

\*Data missing from one patient.

**Table S2.** Univariate analysis.

| Variable                  | <i>b</i> Value | R2 Adjusted Value | <i>p</i> -value |
|---------------------------|----------------|-------------------|-----------------|
| C-reactive protein (mg/L) | 0.000          | −0.015            | 0.636           |
| Albumin (g/L)             | −0.047         | 0.187             | <0.001          |
| Age                       | 0.019          | 0.067             | 0.034           |
| BMI (kg/m <sup>2</sup> )  | −0.06          | 0.079             | 0.024           |
| ECMO support              | -              | -                 | 0.001           |
| Blood pump flux (mL/min)  | −0.051         | −0.017            | 0.456           |
| Blood pump speed (rpm)    | 0.000          | 0.154             | 0.024           |

*b* Value is the regression coefficients for the corresponding independent variable, R2 Adjusted Value explains the proportion of variability in the dependent variable.

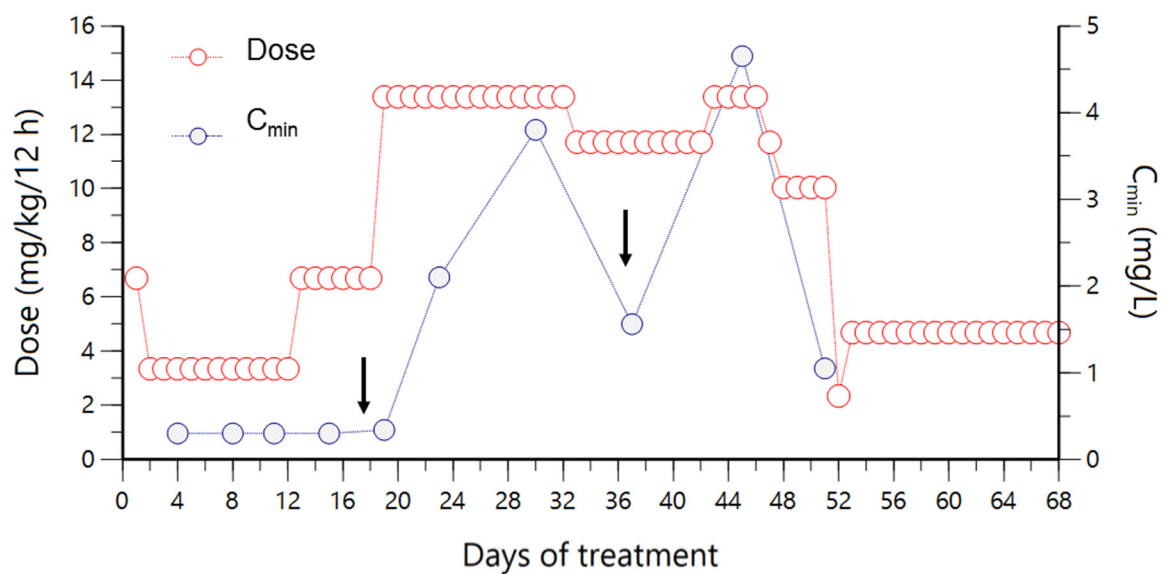

**Figure S1.** Evolution of voriconazole dosages and  $C_{min}$  plasma concentrations in a patient with wild-type CYP2C19 during ECMO support in the ICU. The red dots represent voriconazole doses expressed as mg/kg of adjusted weight administered every 12 hours, while blue dots indicate the corresponding plasma concentrations of voriconazole. Membrane exchanges are indicated with arrows.
